# Supplementary material for: Studies of Conformational Changes of Tubulin Induced by Interaction with Kinesin Using Atomistic Molecular Dynamics Simulations
Source: MDPI journal article supplement (doi:10.3390/ijms22136709), 2021-06-23
Supplement: s1 [file s1]

# Supporting Information

## **Studies of conformational changes of tubulin induced by interaction with kinesin using atomistic molecular dynamics simulations**

Xiao-Xuan Shi <sup>1,2</sup>, Peng-Ye Wang <sup>2</sup>, Hong Chen <sup>1</sup>, and Ping Xie <sup>2,\*</sup>

1. *School of Material Science and Engineering, Central South University of Forestry  
and Technology, Changsha 410004, China*

2. *Key Laboratory of Soft Matter Physics, Institute of Physics, Chinese Academy of  
Sciences, Beijing 100190, China*

\*Corresponding author:

**E-mail address:** pxie@aphy.iphy.ac.cn

## Supporting Figures

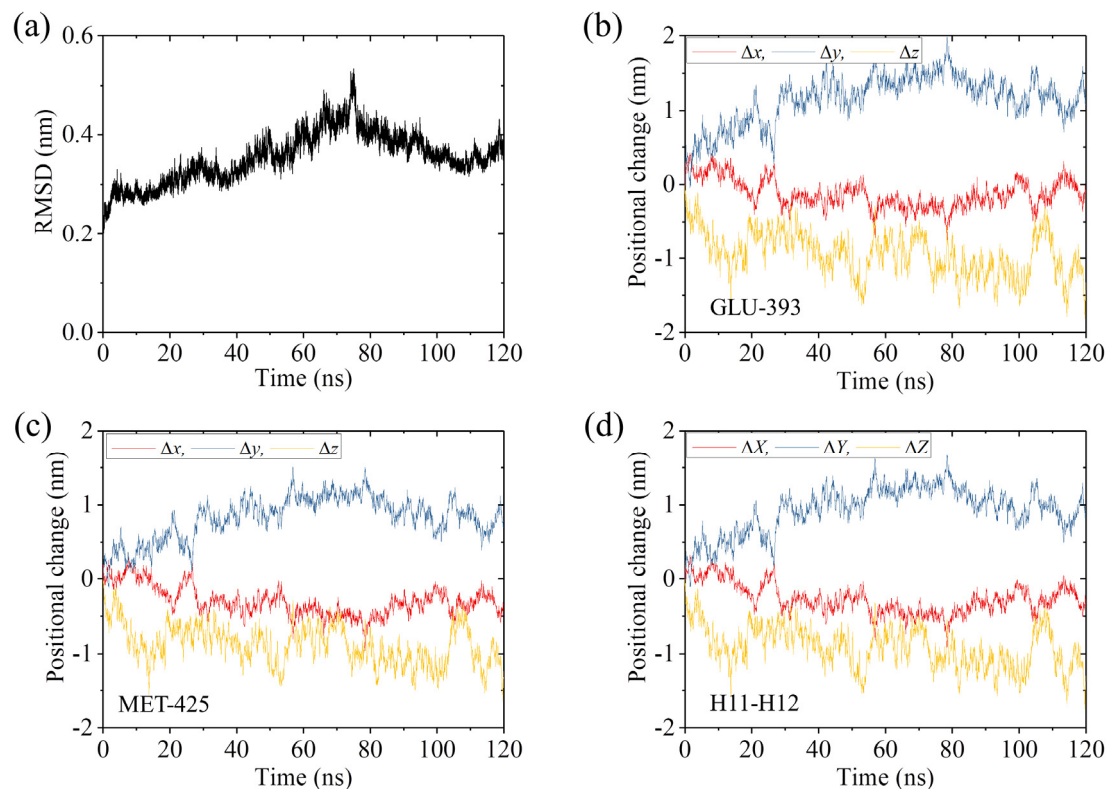

**Figure S1.** Equilibrium MD simulation results for APO-1 system. **(a)** Temporal evolution of RMSD value. **(b, c)** Temporal evolution of positional changes ( $\Delta x$ ,  $\Delta y$  and  $\Delta z$ ) of C $\alpha$  atoms of GLU-393 in H11 and MET-425 in H12 of  $\beta$ -subunit relative to the corresponding ones at  $t = 0$ . **(d)** Temporal evolution of the average positional changes ( $\Delta X$ ,  $\Delta Y$  and  $\Delta Z$ ) of C $\alpha$  atoms of all residues in H11 and H12 of  $\beta$ -subunit.

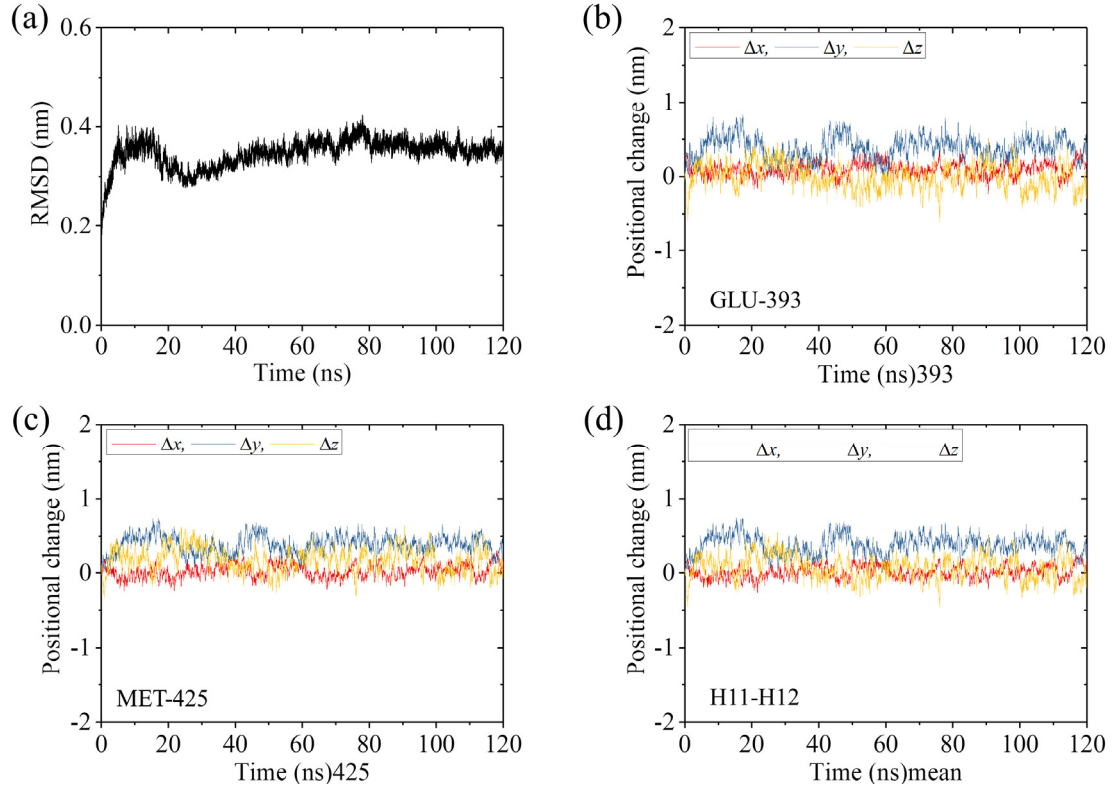

**Figure S2.** Equilibrium MD simulation results for ADP-2 system. **(a)** Temporal evolution of RMSD value. **(b, c)** Temporal evolution of positional changes ( $\Delta x$ ,  $\Delta y$  and  $\Delta z$ ) of C $\alpha$  atoms of GLU-393 in H11 and MET-425 in H12 of  $\beta$ -subunit relative to the corresponding ones at  $t = 0$ . **(d)** Temporal evolution of the average positional changes ( $\Delta X$ ,  $\Delta Y$  and  $\Delta Z$ ) of C $\alpha$  atoms of all residues in H11 and H12 of  $\beta$ -subunit.

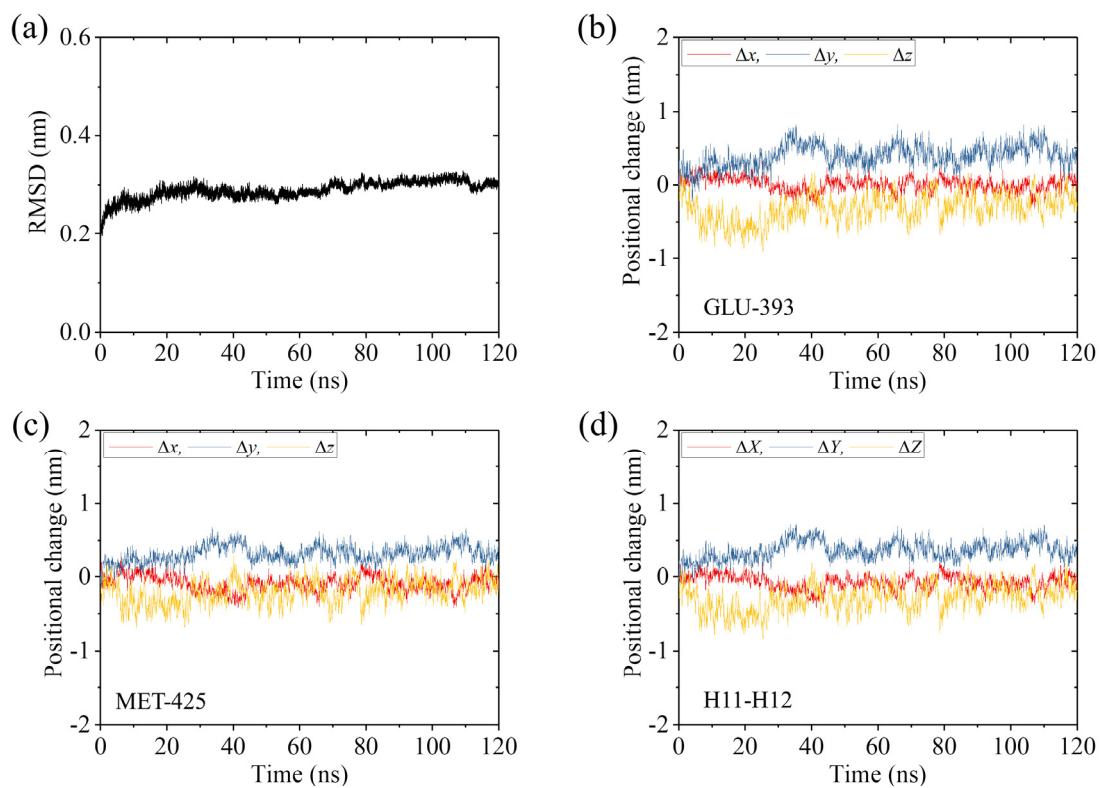

**Figure S3.** Equilibrium MD simulation results for isolated  $\alpha/\beta$ -tubulin. **(a)** Temporal evolution of RMSD value. **(b, c)** Temporal evolution of positional changes ( $\Delta x$ ,  $\Delta y$  and  $\Delta z$ ) of C $\alpha$  atoms of GLU-393 in H11 and MET-425 in H12 of  $\beta$ -subunit relative to the corresponding ones at  $t = 0$ . **(d)** Temporal evolution of the average positional changes ( $\Delta X$ ,  $\Delta Y$  and  $\Delta Z$ ) of C $\alpha$  atoms of all residues in H11 and H12 of  $\beta$ -subunit.

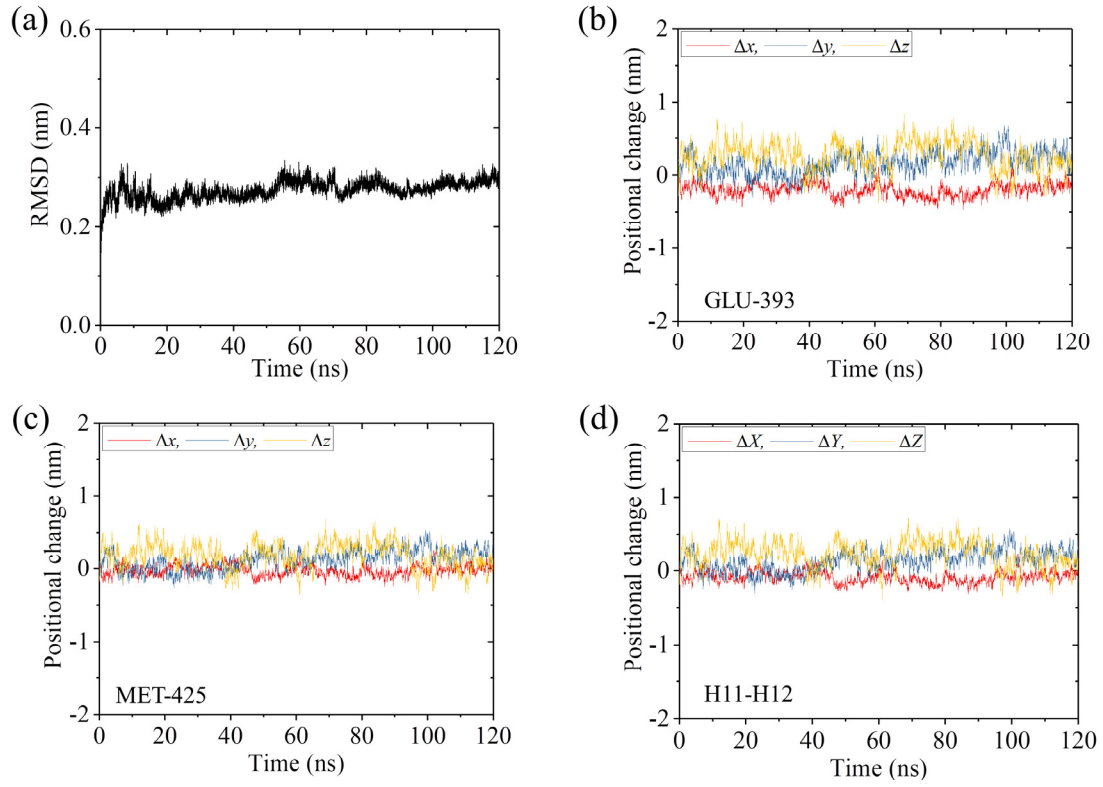

**Figure S4.** Equilibrium MD simulation results for ADP-1 system. **(a)** Temporal evolution of RMSD value. **(b, c)** Temporal evolution of positional changes ( $\Delta x$ ,  $\Delta y$  and  $\Delta z$ ) of C $\alpha$  atoms of GLU-393 in H11 and MET-425 in H12 of  $\beta$ -subunit relative to the corresponding ones at  $t = 0$ . **(d)** Temporal evolution of the average positional changes ( $\Delta X$ ,  $\Delta Y$  and  $\Delta Z$ ) of C $\alpha$  atoms of all residues in H11 and H12 of  $\beta$ -subunit.
